# Supplementary material
Source: publisher figshare collection journal article supplement (https://tandf.figshare.com/articles/dataset/_/1425519)
Supplement: Supplementary file 1 [file 2]

Archive with 2 entries (2 files):
- tbsd_a_1055303_sm1754.pdf
- tbsd_a_1055303_sm1753.pdf
