# Supplementary material
Source: publisher figshare collection journal article supplement (https://tandf.figshare.com/articles/dataset/_/1425519)
Supplement: Supplementary file 1 [file 2 › tbsd_a_1055303_sm1754.pdf]

## INSTRUCTIONS FOR USING VMD SCRIPTS

[http://niifhm.ru/wp-content/uploads/2015/04/VMD\\_script\\_for\\_describing\\_2\\_tetrad\\_GQs.txt](http://niifhm.ru/wp-content/uploads/2015/04/VMD_script_for_describing_2_tetrad_GQs.txt)

[http://niifhm.ru/wp-content/uploads/2015/04/VMD\\_script\\_for\\_describing\\_3\\_tetrad\\_GQs.txt](http://niifhm.ru/wp-content/uploads/2015/04/VMD_script_for_describing_3_tetrad_GQs.txt)

[http://niifhm.ru/wp-content/uploads/2015/04/VMD\\_script\\_for\\_describing\\_4\\_tetrad\\_GQs.txt](http://niifhm.ru/wp-content/uploads/2015/04/VMD_script_for_describing_4_tetrad_GQs.txt)

### 1) Load a molecule of interest or a trajectory in VMD.

For example, we load the 1KF1 directly from PDB by entering the accession code in the VMD molecule file browser form.

### 2) Define the working folder on your PC in the VMD command window

For example, the address of our working folder is “D:\parameters”, so we type “cd D:\parameters”, in the VMD command window.

### 3) Download the appropriate script from our website and save it to your working folder.

For example, 1KF1 is a 3-tetrad GQ, therefore, we go to [http://niifhm.ru/wp-content/uploads/2015/04/VMD\\_script\\_for\\_describing\\_3\\_tetrad\\_GQs.txt](http://niifhm.ru/wp-content/uploads/2015/04/VMD_script_for_describing_3_tetrad_GQs.txt) and save the script as a text file to “D:\parameters”.

### 4) Specify the molecule and set the correct numbers of Gua residues in your script file.

This can be done in WordPad or any other suitable program. Below is the screenshot of the [http://niifhm.ru/wp-content/uploads/2015/04/VMD\\_script\\_for\\_describing\\_3\\_tetrad\\_GQs.txt](http://niifhm.ru/wp-content/uploads/2015/04/VMD_script_for_describing_3_tetrad_GQs.txt) script, in which the ID numbers to be changed and the respective instructions in the headline are highlighted.

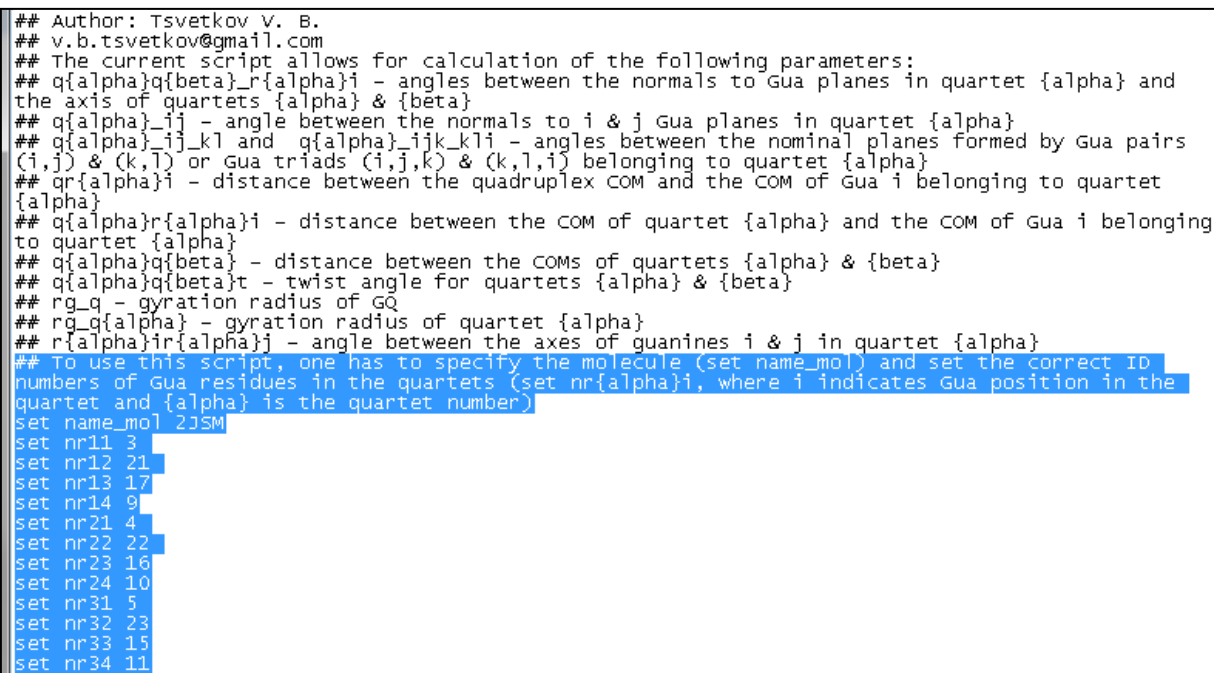

```
## Author: Tsvetkov V. B.
## v.b.tsvetkov@gmail.com
## The current script allows for calculation of the following parameters:
## q{alpha}q{beta}_r{alpha}i - angles between the normals to Gua planes in quartet {alpha} and
## the axis of quartets {alpha} & {beta}
## q{alpha}_ij - angle between the normals to i & j Gua planes in quartet {alpha}
## q{alpha}_ij_kl and q{alpha}_ijk_kli - angles between the nominal planes formed by Gua pairs
## (i,j) & (k,l) or Gua triads (i,j,k) & (k,l,i) belonging to quartet {alpha}
## qr{alpha}i - distance between the quadruplex COM and the COM of Gua i belonging to quartet
## {alpha}
## q{alpha}r{alpha}i - distance between the COM of quartet {alpha} and the COM of Gua i belonging
## to quartet {alpha}
## q{alpha}q{beta} - distance between the COMs of quartets {alpha} & {beta}
## q{alpha}q{beta}t - twist angle for quartets {alpha} & {beta}
## rg_q - gyration radius of GQ
## rg_q{alpha} - gyration radius of quartet {alpha}
## r{alpha}ir{alpha}j - angle between the axes of guanines i & j in quartet {alpha}
## To use this script, one has to specify the molecule (set name_mol) and set the correct ID
## numbers of Gua residues in the quartets (set nr{alpha}i, where i indicates Gua position in the
## quartet and {alpha} is the quartet number)
set name_mol 2JSM
set nr11 3
set nr12 21
set nr13 17
set nr14 9
set nr21 4
set nr22 22
set nr23 16
set nr24 10
set nr31 5
set nr32 23
set nr33 15
set nr34 11
```

For example, to determine nr11-nr14 in VMD for the 1KF1 structure, we label the 5'-terminus, identify visually H-bonding direction in the 5'-terminal quartet and label Gua residues starting from the 5'-terminal one.

In the 1KF1snapshots below, GQ loops are hidden to provide a clear view on the GQ core.

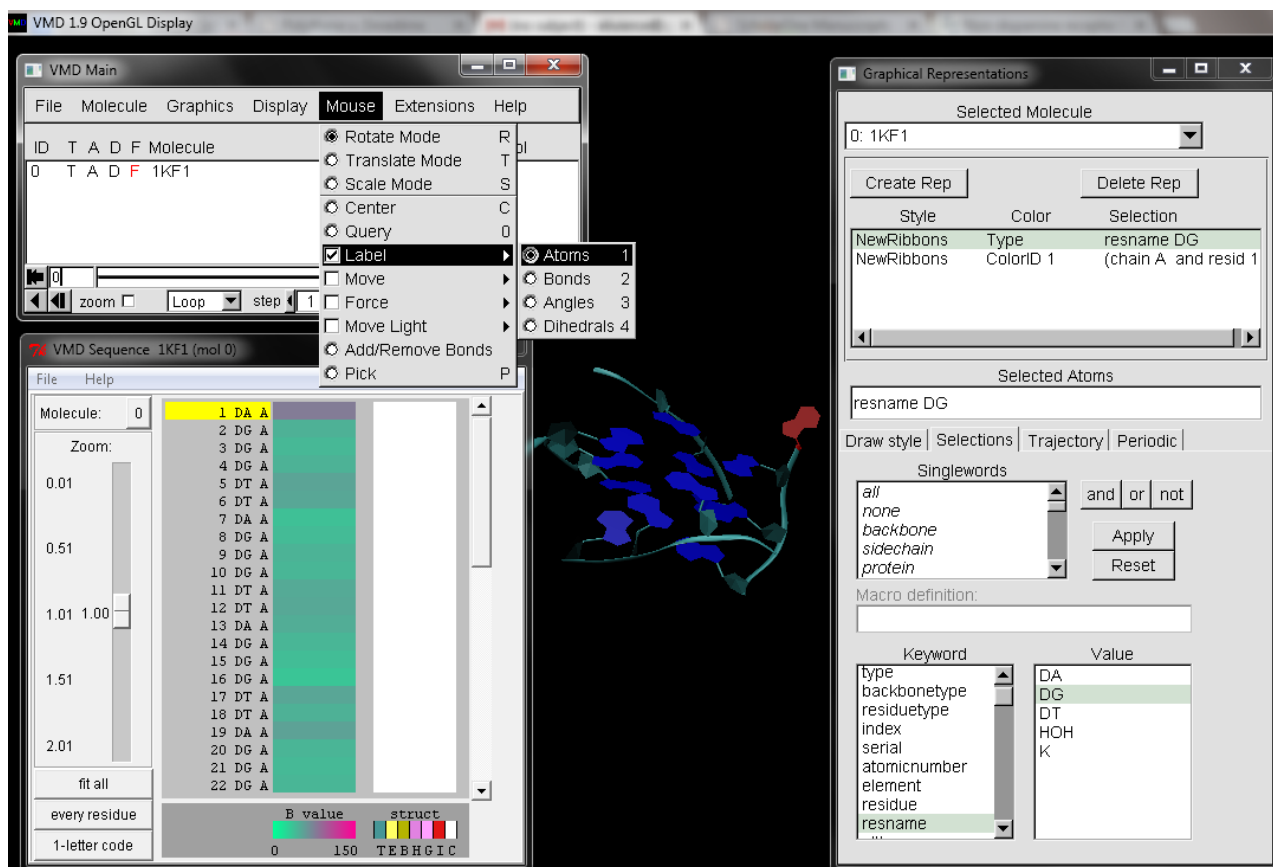

1KF1 with labeled atoms in quartete1:

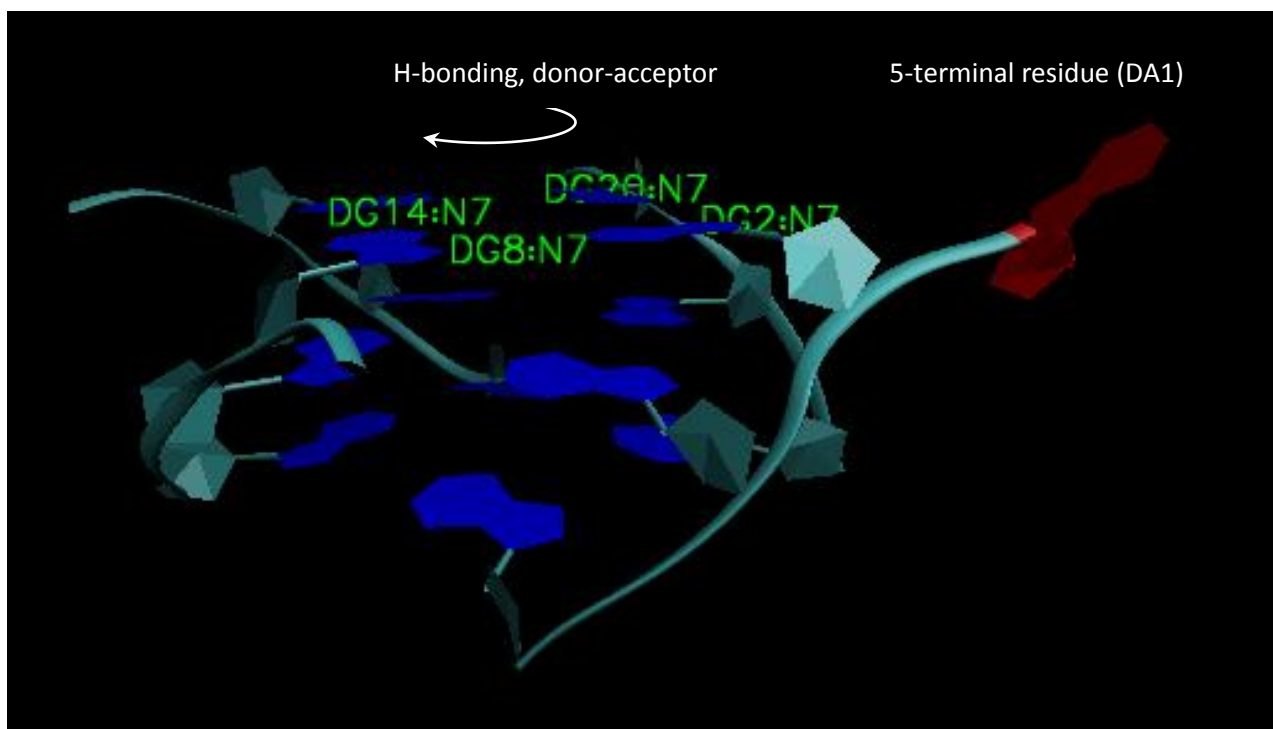

As evident from the snapshot, quartet 1 of the 1KF1 GQ is formed by the following residues:  
DG2: DG8: DG14: DG20 (from the 5'-terminus, donor→acceptor). Thus,

nr11 = 2,  
nr12 = 8  
nr13 = 14  
nr14 = 20

Gua residues in quartets 2 and 3 are labeled accordingly, i.e., in the direction of H-bonding in quartet 1. Quartet 2 is DG3: DG9: DG15: DG21. Thus,

nr21 = 3,  
nr22 = 9  
nr23 = 15  
nr24 = 21

Quartet 3 is DG4: DG10: DG16: DG22.

nr31 = 4,  
nr32 = 10  
nr33 = 16  
nr34 = 22

We set these numbers in the script file and save all the changes (the final version with highlighted changes is shown below).

```
## Author: Tsvetkov V. B.  
## v.b.tsvetkov@gmail.com  
## The current script allows for calculation of the following parameters:  
## q{alpha}q{beta}_r{alpha}i - angles between the normals to Gua planes in quartet {alpha}  
## and the axis of quartets {alpha} & {beta}  
## q{alpha}_ij - angle between the normals to i & j Gua planes in quartet {alpha}  
## q{alpha}_ij_kl and q{alpha}_ijk_kli - angles between the nominal planes formed by Gua  
## pairs (i,j) & (k,l) or Gua triads (i,j,k) & (k,l,i) belonging to quartet {alpha}  
## qr{alpha}i - distance between the quadruplex COM and the COM of Gua i belonging to quartet  
## {alpha}  
## q{alpha}r{alpha}i - distance between the COM of quartet {alpha} and the COM of Gua i  
## belonging to quartet {alpha}  
## q{alpha}q{beta} - distance between the COMs of quartets {alpha} & {beta}  
## q{alpha}q{beta}t - twist angle for quartets {alpha} & {beta}  
## rg_q - gyration radius of GQ  
## rg_q{alpha} - gyration radius of quartet {alpha}  
## r{alpha}ir{alpha}j - angle between the axes of guanines i & j in quartet {alpha}  
## To use this script, one has to specify the molecule (set name_mol) and set the ID numbers  
## of Gua residues in the quartets (set nr{alpha}i, where i indicates Gua position in the  
## quartet and {alpha} is the quartet number)  
set name_mol 1KF1  
set nr11 2  
set nr12 8  
set nr13 14  
set nr14 20  
set nr21 3  
set nr22 9  
set nr23 15  
set nr24 21  
set nr31 4  
set nr32 10  
set nr33 16  
set nr34 22  
set outfile1 [open ${name_mol}  
_Quartet_1_Angles_between_the_normals_to_Gua_planes_and_the_axis_of_quartets_1_and_2.dat w]  
puts $outfile1 [format "%4s\t%4s\t%4s\t%4s\t%4s\t" frame q1q2_r11 q1q2_r12 q1q2_r13 q1q2_r14]  
set outfile2 [open ${name_mol}  
_Quartet_2_Angles_between_the_normals_to_Gua_planes_and_the_axis_of_quartets_2_and_3.dat w]  
puts $outfile2 [format "%4s\t%4s\t%4s\t%4s\t%4s\t" frame q2q3_r21 q2q3_r22 q2q3_r23 q2q3_r24]  
set outfile3 [open ${name_mol}  
_Quartet_3_Angles_between_the_normals_to_Gua_planes_and_the_axis_of_quartets_3_and_2.dat w]  
puts $outfile3 [format "%4s\t%4s\t%4s\t%4s\t%4s\t" frame q3q4_r31 q3q4_r32 q3q4_r33 q3q4_r34]  
set outfile5 [open ${name_mol}_Quartet_1_Angles_between_the_normals_to_Gua_planes.dat w]  
puts $outfile5 [format "%4s\t%4s\t%4s\t%4s\t%4s\t%4s\t" frame q1_12 q1_13 q1_14 q1_23  
q1_24_c q1_34]  
set outfile6 [open ${name_mol}_Quartet_2_Angles_between_the_normals_to_Gua_planes.dat w]  
puts $outfile6 [format "%4s\t%4s\t%4s\t%4s\t%4s\t%4s\t" frame q2_12 q2_13 q2_14 q2_23  
q2_24_c q2_34]  
set outfile7 [open ${name_mol}_Quartet_3_Angles_between_the_normals_to_Gua_planes.dat w]  
puts $outfile7 [format "%4s\t%4s\t%4s\t%4s\t%4s\t%4s\t" frame q3_12 q3_13 q3_14 q3_23
```

- 5) **Run the script from the VMD command window. The output files will be loaded into your working folder.**

For example, we type “source VMD\_script\_for\_describing\_3\_tetrad\_GQs.txt” in the command window.

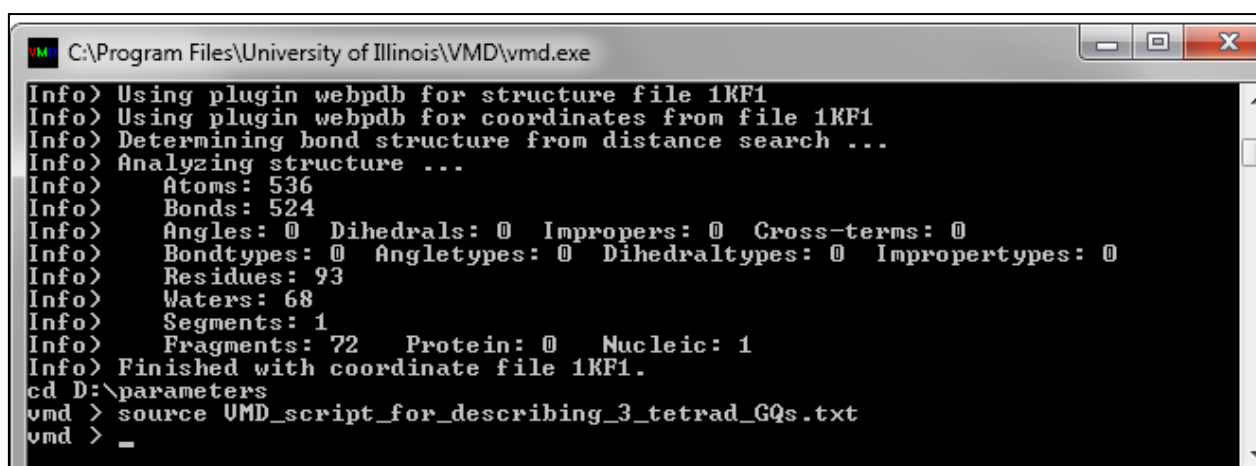

The screenshot shows a VMD command window titled "C:\Program Files\University of Illinois\VMD\vmd.exe". The window contains the following text:

```
Info> Using plugin webpdb for structure file 1KF1
Info> Using plugin webpdb for coordinates from file 1KF1
Info> Determining bond structure from distance search ...
Info> Analyzing structure ...
Info> Atoms: 536
Info> Bonds: 524
Info> Angles: 0 Dihedrals: 0 Improper: 0 Cross-terms: 0
Info> Bondtypes: 0 Angletypes: 0 Dihedraltypes: 0 Impropertypes: 0
Info> Residues: 93
Info> Waters: 68
Info> Segments: 1
Info> Fragments: 72 Protein: 0 Nucleic: 1
Info> Finished with coordinate file 1KF1.
cd D:\parameters
vmd > source VMD_script_for_describing_3_tetrad_GQs.txt
vmd > _
```

In our working folder “parameters”, there are now 18 output files.

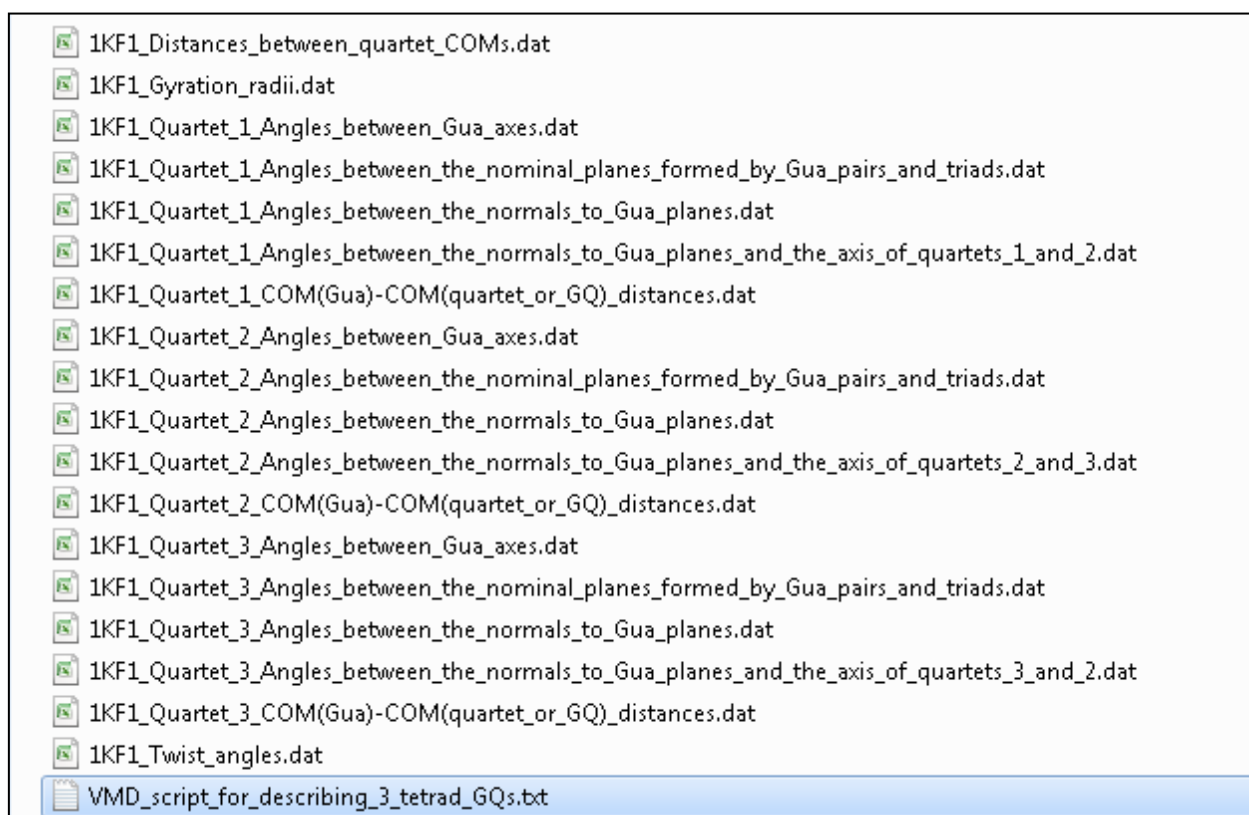

In the case of a 2-tetrad GQ, there would be 13 output files, and in the case of a 4-tetrad GQ – 23 files.

The contents of the output files in described in the script headline (see the highlighted section):

```
## Author: Tsvetkov V. B.
## v.b.tsvetkov@gmail.com
## The current script allows for calculation of the following parameters:
## q{alpha}q{beta}_r{alpha}i - angles between the normals to Gua planes in quartet {alpha} and
## the axis of quartets {alpha} & {beta}
## q{alpha}_ij - angle between the normals to i & j Gua planes in quartet {alpha}
## q{alpha}_ij_kl and q{alpha}_ijk_kli - angles between the nominal planes formed by Gua
## pairs (i,j) & (k,l) or Gua triads (i,j,k) & (k,l,i) belonging to quartet {alpha}
## qr{alpha}i - distance between the quadruplex COM and the COM of Gua i belonging to quartet
## {alpha}
## q{alpha}r{alpha}i - distance between the COM of quartet {alpha} and the COM of Gua i
## belonging to quartet {alpha}
## q{alpha}q{beta} - distance between the COMs of quartets {alpha} & {beta}
## q{alpha}q{beta}t - twist angle for quartets {alpha} & {beta}
## rg_q - gyration radius of GQ
## rg_q{alpha} - gyration radius of quartet {alpha}
## r{alpha}ir{alpha}i - angle between the axes of guanines i & j in quartet {alpha}
## To use this script, one has to specify the molecule (set name_mol) and the numbers of Gua
## residues in the quartets (set nr{alpha}i, where i indicates Gua position in the quartet and
## {alpha} the quartet number)
```

For example, our output file

“1KF1\_Quartet\_2\_Angles\_between\_the\_normals\_to\_Gua\_planes.dat” contains the following data:

| frame | q2_12   | q2_13   | q2_14  | q2_23   | q2_24  | q2_34  |
|-------|---------|---------|--------|---------|--------|--------|
| 0     | 10.4355 | 15.9476 | 9.4101 | 11.7287 | 9.1195 | 6.7028 |

q2\_ij is the angle between the normals to Gua<sub>i</sub> and Gua<sub>j</sub> in quartet 2.

If the initial pdb file contains several GQ models for the same sequence (as in the case of 2JSM), the output file will contain a respective number of rows: frames 0 – (X-1), where X is the number of models.

If the script is run for a trajectory, the output file will contain Y rows, where Y is the number of snapshots.
